# Supplementary material for: Dynamic Changes in Volatiles, Soluble Sugars, and Fatty Acids in Glutinous Rice during Cooking
Source: MDPI journal article supplement (doi:10.3390/foods12081700), 2023-04-19
Supplement: s1 [file s1]

## Supplementary Materials

Table S1 Peak area of volatile compounds ( $\times 10^6$ ) in two rice samples during rice cooking process

| No. | Compounds                | Chunjiangnuo           |                         |                         |                         | Fuxiangnuo             |                         |                         |                        | RI <sub>cal</sub> <sup>a</sup> | RI <sub>ref</sub> <sup>b</sup> | Odor description <sup>c</sup> |
|-----|--------------------------|------------------------|-------------------------|-------------------------|-------------------------|------------------------|-------------------------|-------------------------|------------------------|--------------------------------|--------------------------------|-------------------------------|
|     |                          | RR                     | WR                      | PR                      | CR                      | RR                     | WR                      | PR                      | CR                     |                                |                                |                               |
| 1   | (Z)-5-Octen-1-ol         | 0.25±0.01 <sup>b</sup> | 0.28±0.02 <sup>b</sup>  | 0.36±0.03 <sup>b</sup>  | 1.08±0.28 <sup>a</sup>  | 0.22±0.02 <sup>b</sup> | 0.24±0.01 <sup>b</sup>  | 0.27±0.09 <sup>b</sup>  | 1.12±0.31 <sup>a</sup> | 1287                           | 1287                           | fat, soap, lemon, green       |
| 2   | 1-Octen-3-ol             | 0.84±0.05 <sup>b</sup> | 0.96±0.10 <sup>b</sup>  | 1.12±0.14 <sup>ab</sup> | 1.32±0.30 <sup>a</sup>  | 0.65±0.01 <sup>b</sup> | 0.81±0.03 <sup>ab</sup> | 0.93±0.27 <sup>ab</sup> | 1.10±0.31 <sup>a</sup> | 1455                           | 1455                           | mushroom                      |
|     | Alcohols                 | 1.09±0.06              | 1.24±0.11               | 1.47±0.17               | 2.40±0.57               | 0.87±0.01              | 1.05±0.04               | 1.20±0.35               | 2.22±0.61              |                                |                                |                               |
| 3   | Pentanal                 | 0.07±0.01 <sup>b</sup> | 0.04±0.04 <sup>b</sup>  | 0.07±0.01 <sup>b</sup>  | 0.18±0.05 <sup>a</sup>  | ND                     | 0.05±0.01 <sup>b</sup>  | ND                      | 0.16±0.04 <sup>a</sup> | 972                            | 972                            | almond, malt, pungent         |
| 4   | Hexanal                  | 3.27±0.06 <sup>b</sup> | 3.19±0.20 <sup>b</sup>  | 4.28±0.64 <sup>b</sup>  | 9.32±1.71 <sup>a</sup>  | 2.84±0.18 <sup>b</sup> | 2.84±0.2 <sup>b</sup>   | 3.58±0.86 <sup>b</sup>  | 7.91±1.99 <sup>a</sup> | 1078                           | 1078                           | grass, tallow, fat            |
| 5   | Heptanal                 | 0.15±0.13 <sup>b</sup> | 0.15±0.13 <sup>b</sup>  | 0.44±0.09 <sup>a</sup>  | 0.46±0.12 <sup>a</sup>  | 0.17±0.15 <sup>b</sup> | 0.27±0.02 <sup>ab</sup> | 0.51±0.20 <sup>a</sup>  | 0.44±0.11 <sup>a</sup> | 1182                           | 1182                           | fat, citrus, rancid           |
| 6   | <i>trans</i> -2-Heptenal | 0.49±0.02 <sup>b</sup> | 0.52±0.01 <sup>ab</sup> | 0.63±0.09 <sup>a</sup>  | 0.58±0.11 <sup>ab</sup> | 0.31±0.03 <sup>a</sup> | 0.35±0.02 <sup>a</sup>  | 0.48±0.20 <sup>a</sup>  | 0.45±0.11 <sup>a</sup> | 1318                           | 1318                           | green, soap, fat, almond      |

|    |                               |                         |                         |                         |                         |                         |                         |                        |                         |      |      |                              |
|----|-------------------------------|-------------------------|-------------------------|-------------------------|-------------------------|-------------------------|-------------------------|------------------------|-------------------------|------|------|------------------------------|
| 7  | Nonanal                       | 2.26±0.11 <sup>c</sup>  | 7.48±0.62 <sup>a</sup>  | 8.11±0.43 <sup>a</sup>  | 3.45±0.83 <sup>b</sup>  | 2.82±0.36 <sup>c</sup>  | 7.68±0.98 <sup>ab</sup> | 8.83±2.69 <sup>a</sup> | 4.89±1.13 <sup>bc</sup> | 1391 | 1391 | fat, citrus,<br>green        |
| 8  | <i>trans</i> -2-octenal       | 1.80±0.10 <sup>a</sup>  | 1.66±0.16 <sup>a</sup>  | 2.17±0.44 <sup>a</sup>  | 1.76±0.31 <sup>a</sup>  | 1.06±0.08 <sup>a</sup>  | 1.02±0.09 <sup>a</sup>  | 1.47±0.30 <sup>a</sup> | 1.46±0.37 <sup>a</sup>  | 1425 | 1425 | green, nut, fat              |
| 9  | Decanal                       | 1.20±0.22 <sup>c</sup>  | 1.64±0.01 <sup>a</sup>  | 1.53±0.03 <sup>ab</sup> | 1.25±0.23 <sup>bc</sup> | 0.42±0.37 <sup>b</sup>  | 1.31±0.22 <sup>a</sup>  | 1.37±0.36 <sup>a</sup> | 1.06±0.23 <sup>a</sup>  | 1497 | 1497 | soap, orange<br>peel, tallow |
| 10 | <i>trans</i> -2-Nonenal       | 1.29±0.18 <sup>c</sup>  | 1.86±0.14 <sup>b</sup>  | 2.69±0.27 <sup>a</sup>  | 0.55±0.05 <sup>d</sup>  | 1.35±0.33 <sup>bc</sup> | 1.91±0.46 <sup>ab</sup> | 2.62±0.53 <sup>a</sup> | 0.68±0.16 <sup>c</sup>  | 1531 | 1531 | cucumber, fat,<br>green      |
| 11 | ( <i>E</i> )-2-Decenal        | 0.49±0.17 <sup>a</sup>  | 0.42±0.14 <sup>a</sup>  | 0.17±0.30 <sup>a</sup>  | 0.30±0.05 <sup>a</sup>  | 0.20±0.17 <sup>a</sup>  | ND                      | 0.23±0.21 <sup>a</sup> | 0.42±0.11 <sup>a</sup>  | 1640 | 1640 | tallow                       |
| 12 | 2-Butyl-2-octenal             | 6.25±0.84 <sup>a</sup>  | 2.30±0.46 <sup>b</sup>  | 2.51±0.49 <sup>b</sup>  | 6.47±0.65 <sup>a</sup>  | 3.53±0.25 <sup>a</sup>  | 1.81±0.54 <sup>b</sup>  | 1.63±0.07 <sup>b</sup> | 3.24±0.45 <sup>a</sup>  | 1666 | 1666 | green                        |
| 13 | ( <i>E,E</i> )-2,4-Nonadienal | 0.39±0.14 <sup>a</sup>  | 0.28±0.25 <sup>a</sup>  | 0.56±0.05 <sup>a</sup>  | 0.31±0.10 <sup>a</sup>  | 0.31±0.04 <sup>a</sup>  | 0.45±0.21 <sup>a</sup>  | 0.35±0.04 <sup>a</sup> | 0.25±0.11 <sup>a</sup>  | 1696 | 1696 | fat, wax,<br>green           |
| 14 | 2-Undecenal                   | 0.36±0.10 <sup>ab</sup> | 0.25±0.22 <sup>ab</sup> | 0.42±0.15 <sup>a</sup>  | 0.12±0.11 <sup>b</sup>  | 0.25±0.03 <sup>a</sup>  | 0.23±0.10 <sup>a</sup>  | 0.28±0.07 <sup>a</sup> | 0.21±0.05 <sup>a</sup>  | 1749 | 1749 | sweet                        |
| 15 | ( <i>E,E</i> )-2,4-Decadienal | 0.24±0.24 <sup>a</sup>  | 0.31±0.09 <sup>a</sup>  | 0.34±0.09 <sup>a</sup>  | 0.19±0.06 <sup>a</sup>  | ND                      | 0.06±0.11 <sup>a</sup>  | ND                     | 0.17±0.05 <sup>a</sup>  | 1805 | 1805 | fried, wax, fat              |
| 16 | Vanillin                      | 0.08±0.04 <sup>ab</sup> | 0.05±0.02 <sup>b</sup>  | 0.04±0.01 <sup>b</sup>  | 0.11±0.0 <sup>a</sup>   | 0.08±0.03 <sup>ab</sup> | 0.05±0.02 <sup>bc</sup> | 0.03±0.01 <sup>c</sup> | 0.11±0.02 <sup>a</sup>  | 2554 | 2554 | vanilla                      |
|    | Aldehydes                     | 18.33±1.61              | 20.16±1.21              | 23.96±2.47              | 25.06±3.94              | 13.33±0.45              | 18.03±1.83              | 21.39±4.97             | 21.44±4.78              |      |      |                              |

|    |                          |                        |                         |                         |                        |                         |                         |                         |                        |      |      |                       |
|----|--------------------------|------------------------|-------------------------|-------------------------|------------------------|-------------------------|-------------------------|-------------------------|------------------------|------|------|-----------------------|
| 17 | 6-Methyltridecane        | ND                     | ND                      | ND                      | 0.42±0.26              | ND                      | ND                      | ND                      | 0.99±0.06              | 1300 | 1300 |                       |
| 18 | 3-Methyltridecane        | 0.69±0.25 <sup>a</sup> | 0.35±0.14 <sup>bc</sup> | 0.53±0.22 <sup>ab</sup> | 0.13±0.00 <sup>c</sup> | 0.79±0.25 <sup>a</sup>  | 0.41±0.07 <sup>ab</sup> | 0.59±0.19 <sup>ab</sup> | 0.24±0.04 <sup>b</sup> | 1368 | 1368 |                       |
| 19 | Tetradecane              | 1.36±0.88 <sup>a</sup> | 1.14±0.68 <sup>a</sup>  | 1.23±0.77 <sup>a</sup>  | 0.68±0.36 <sup>a</sup> | 1.29±0.94 <sup>a</sup>  | 1.18±0.27 <sup>a</sup>  | 1.33±0.67 <sup>a</sup>  | 0.74±0.29 <sup>a</sup> | 1400 | 1400 |                       |
| 20 | Hexadecane               | 1.70±0.65 <sup>a</sup> | 1.64±0.27 <sup>a</sup>  | 1.75±0.52 <sup>a</sup>  | 1.05±0.34 <sup>a</sup> | 1.33±0.49 <sup>ab</sup> | 1.68±0.34 <sup>a</sup>  | 1.88±0.36 <sup>a</sup>  | 0.62±0.10 <sup>b</sup> | 1600 | 1600 | alkane                |
|    | Alkanes                  | 3.75±1.75              | 3.13±1.01               | 3.52±1.47               | 2.28±0.17              | 3.41±1.69               | 3.27±0.26               | 3.80±0.85               | 2.59±0.18              |      |      |                       |
| 21 | Styrene                  | 1.03±0.41 <sup>a</sup> | 0.29±0.09 <sup>b</sup>  | 0.39±0.06 <sup>b</sup>  | 0.15±0.04 <sup>b</sup> | 1.44±0.40 <sup>a</sup>  | 0.35±0.07 <sup>b</sup>  | 0.40±0.09 <sup>b</sup>  | 0.18±0.09 <sup>b</sup> | 1251 | 1251 | balsamic,<br>gasoline |
| 22 | Naphthalene              | 0.88±0.12 <sup>b</sup> | 0.88±0.05 <sup>b</sup>  | 1.05±0.06 <sup>a</sup>  | 0.55±0.07 <sup>c</sup> | 0.92±0.07 <sup>a</sup>  | 0.97±0.16 <sup>a</sup>  | 0.98±0.06 <sup>a</sup>  | 0.54±0.09 <sup>b</sup> | 1730 | 1730 | tar                   |
| 23 | <i>trans</i> -Calamenene | 0.13±0.02 <sup>b</sup> | 0.13±0.02 <sup>b</sup>  | 0.11±0.07 <sup>b</sup>  | 0.15±0.01 <sup>b</sup> | 0.09±0.01 <sup>a</sup>  | 0.12±0.04 <sup>a</sup>  | 0.09±0.03 <sup>a</sup>  | 0.11±0.02 <sup>a</sup> | 1828 | 1828 | herb, spice           |
|    | 2-                       |                        |                         |                         |                        |                         |                         |                         |                        |      |      | floral                |
| 24 | Methylnaphthalene        | 0.47±0.14 <sup>a</sup> | 0.16±0.14 <sup>b</sup>  | 0.32±0.20 <sup>ab</sup> | 0.17±0.01 <sup>b</sup> | 0.50±0.16 <sup>a</sup>  | 0.48±0.38 <sup>a</sup>  | 0.34±0.25 <sup>a</sup>  | 0.19±0.01 <sup>a</sup> | 1877 | 1877 | sweet floral<br>woody |
| 25 | Fluorene                 | 0.05±0.04 <sup>a</sup> | 0.06±0.01 <sup>a</sup>  | 0.03±0.02 <sup>a</sup>  | 0.03±0.01 <sup>a</sup> | 0.05±0.04 <sup>a</sup>  | 0.05±0.01 <sup>a</sup>  | 0.02±0.02 <sup>a</sup>  | 0.03±0.00 <sup>a</sup> | 2324 | 2324 |                       |
| 26 | Benzophenone             | 0.06±0.01 <sup>a</sup> | 0.02±0.02 <sup>b</sup>  | 0.03±0.01 <sup>b</sup>  | ND                     | 0.05±0.00 <sup>a</sup>  | 0.02±0.01 <sup>b</sup>  | 0.02±0.02 <sup>b</sup>  | ND                     | 2469 | 2469 |                       |

|    |                                       |                         |                        |                        |                         |                        |                        |                        |                         |      |      |                    |
|----|---------------------------------------|-------------------------|------------------------|------------------------|-------------------------|------------------------|------------------------|------------------------|-------------------------|------|------|--------------------|
| 27 | Dibutyl phthalate                     | 0.86±0.84 <sup>a</sup>  | 0.27±0.12 <sup>a</sup> | 0.19±0.07 <sup>a</sup> | 0.14±0.02 <sup>a</sup>  | 0.53±0.32 <sup>a</sup> | 0.30±0.28 <sup>a</sup> | 0.28±0.32 <sup>a</sup> | 0.09±0.02 <sup>a</sup>  | 2675 | 2675 |                    |
|    | Aromatics                             | 3.48±1.35               | 1.80±0.14              | 2.11±0.40              | 1.19±0.11               | 3.57±0.90              | 2.30±0.76              | 2.15±0.67              | 1.14±0.22               |      |      |                    |
| 28 | Acetic acid, methyl ester             | 0.22±0.05 <sup>a</sup>  | 0.02±0.03 <sup>b</sup> | 0.02±0.03 <sup>b</sup> | 0.03±0.03 <sup>b</sup>  | 0.35±0.02 <sup>a</sup> | ND                     | 0.03±0.05 <sup>b</sup> | ND                      | 835  | 835  | ethereal           |
| 29 | Ethyl Acetate                         | 1.06±0.15 <sup>a</sup>  | 0.18±0.03 <sup>b</sup> | 0.14±0.06 <sup>b</sup> | 0.14±0.03 <sup>b</sup>  | 2.01±0.23 <sup>a</sup> | 0.20±0.02 <sup>b</sup> | 0.23±0.06 <sup>b</sup> | 0.05±0.04 <sup>b</sup>  | 888  | 888  | pineapple          |
| 30 | Methyl tetradecanoate                 | 0.32±0.14 <sup>a</sup>  | 0.04±0.07 <sup>b</sup> | ND                     | 0.32±0.11 <sup>a</sup>  | 0.87±0.18 <sup>a</sup> | 0.16±0.06 <sup>b</sup> | 0.05±0.08 <sup>b</sup> | 0.55±0.15 <sup>a</sup>  | 2000 | 2000 | orris              |
|    | (Z)-9-Octadecenoic acid, methyl ester | 0.54±0.30 <sup>ab</sup> | 0.05±0.09 <sup>b</sup> | ND                     | 1.23±0.99 <sup>a</sup>  | 0.87±0.63 <sup>a</sup> | ND                     | ND                     | 0.53±0.53 <sup>a</sup>  | 2447 | 2447 | mild fatty         |
|    | Esters                                | 2.14±0.50               | 0.29±0.10              | 0.16±0.09              | 1.72±1.15               | 4.10±0.58              | 0.36±0.07              | 0.31±0.12              | 1.13±0.65               |      |      |                    |
| 32 | 2-Ethylfuran                          | ND                      | ND                     | ND                     | 0.12±0.04               | ND                     | ND                     | ND                     | 0.08±0.02               | 946  | 946  | chemical           |
| 33 | 2-Propylfuran                         | ND                      | ND                     | ND                     | 0.07±0.06               | ND                     | ND                     | ND                     | 0.02±0.03               | 1029 | 1029 |                    |
| 34 | 2-n-Butylfuran                        | 0.15±0.02 <sup>b</sup>  | 0.07±0.06 <sup>b</sup> | 0.10±0.09 <sup>b</sup> | 0.73±0.20 <sup>a</sup>  | 0.09±0.08 <sup>b</sup> | ND                     | ND                     | 0.51±0.1 <sup>a</sup>   | 1133 | 1133 | spicy              |
| 35 | 2-Pentylfuran,                        | 3.02±0.20 <sup>b</sup>  | 2.30±0.06 <sup>b</sup> | 2.40±0.43 <sup>b</sup> | 16.10±4.68 <sup>a</sup> | 2.16±0.14 <sup>b</sup> | 1.66±0.31 <sup>b</sup> | 1.87±0.53 <sup>b</sup> | 12.82±2.68 <sup>a</sup> | 1231 | 1231 | green bean, butter |

|    |                         |                        |                        |                        |                        |                         |                        |                         |                        |      |      |                                               |
|----|-------------------------|------------------------|------------------------|------------------------|------------------------|-------------------------|------------------------|-------------------------|------------------------|------|------|-----------------------------------------------|
| 36 | 2-n-Heptylfuran         | ND                     | ND                     | ND                     | 0.09±0.08              | ND                      | ND                     | ND                      | 0.05±0.09              | 1432 | 1432 | green                                         |
|    | Furans                  | 3.17±0.22              | 2.37±0.05              | 2.50±0.52              | 17.11±5.04             | 2.25±0.16               | 1.66±0.31              | 1.87±0.53               | 13.47±2.88             |      |      |                                               |
| 37 | 2-Heptanone             | 0.28±0.02 <sup>b</sup> | 0.13±0.11 <sup>b</sup> | 0.20±0.04 <sup>b</sup> | 0.62±0.14 <sup>a</sup> | 0.33±0.21 <sup>ab</sup> | 0.11±0.09 <sup>b</sup> | 0.13±0.11 <sup>ab</sup> | 0.51±0.13 <sup>a</sup> | 1180 | 1180 | soap                                          |
| 38 | 2-Octanone              | 0.69±0.12 <sup>b</sup> | 0.64±0.17 <sup>b</sup> | 1.34±0.27 <sup>a</sup> | 0.19±0.05 <sup>c</sup> | 0.80±0.25 <sup>b</sup>  | 0.93±0.08 <sup>b</sup> | 1.85±0.33 <sup>a</sup>  | 0.22±0.05 <sup>c</sup> | 1283 | 1283 | soap, gasoline                                |
| 39 | 6-Methyl-5-hepten-2-one | ND                     | ND                     | ND                     | 0.17±0.04              | ND                      | ND                     | ND                      | 0.13±0.03              | 1336 | 1336 | pepper,<br>mushroom,<br>rubber                |
| 40 | 2-Nonanone              | ND                     | ND                     | ND                     | 0.26±0.07              | ND                      | ND                     | ND                      | 0.25±0.05              | 1387 | 1387 | hot milk,<br>soap, green<br>fruity berry      |
| 41 | 3-Nonen-2-one           | 0.46±0.07 <sup>a</sup> | 0.33±0.08 <sup>a</sup> | 0.44±0.21 <sup>a</sup> | 0.46±0.13 <sup>a</sup> | 0.24±0.08 <sup>a</sup>  | 0.16±0.15 <sup>a</sup> | 0.24±0.08 <sup>a</sup>  | 0.21±0.05 <sup>a</sup> | 1509 | 1509 | fatty oily<br>ketonic weedy<br>spicy licorice |
| 42 | 6-Undecanone            | ND                     | ND                     | ND                     | 0.54±0.07              | ND                      | ND                     | ND                      | 0.35±0.09              | 1526 | 1526 | orange, fresh,<br>green                       |
| 43 | Geranylacetone          | 1.11±0.21 <sup>a</sup> | 1.05±0.10 <sup>a</sup> | 1.22±0.19 <sup>a</sup> | 1.15±0.14 <sup>a</sup> | 0.88±0.10 <sup>a</sup>  | 1.00±0.25 <sup>a</sup> | 1.02±0.05 <sup>a</sup>  | 0.63±0.13 <sup>a</sup> | 1853 | 1853 | magnolia,<br>green                            |

|    |                    |                        |                         |                        |                        |                        |                         |                         |                         |      |      |                 |
|----|--------------------|------------------------|-------------------------|------------------------|------------------------|------------------------|-------------------------|-------------------------|-------------------------|------|------|-----------------|
| 44 | 2-Pentadecanone    | 0.09±0.16 <sup>a</sup> | ND                      | 0.08±0.14 <sup>a</sup> | 0.19±0.02 <sup>a</sup> | ND                     | 0.38±0.06 <sup>a</sup>  | 0.22±0.20 <sup>ab</sup> | 0.21±0.04 <sup>ab</sup> | 2009 | 2009 |                 |
|    | Ketones            | 2.63±0.47              | 2.15±0.23               | 3.28±0.68              | 3.59±0.64              | 2.25±0.62              | 2.58±0.34               | 3.46±0.33               | 2.50±0.53               |      |      |                 |
| 45 | Methylene chloride | 0.18±0.07              | ND                      | ND                     | ND                     | 0.15±0.03 <sup>a</sup> | 0.01±0.01 <sup>a</sup>  | ND                      | ND                      | 925  | 925  |                 |
| 46 | 2-Pentylthiophene  | ND                     | ND                      | ND                     | 0.64±0.10              | ND                     | ND                      | ND                      | 0.16±0.28               | 1454 | 1454 | sweet, fruit    |
| 47 | Isophorone         | ND                     | ND                      | ND                     | ND                     | 0.29±0.50 <sup>b</sup> | 0.58±0.50 <sup>ab</sup> | 0.62±0.54 <sup>ab</sup> | 1.44±0.36 <sup>a</sup>  | 1586 | 1586 |                 |
| 48 | Cedrol             | 2.84±0.61 <sup>a</sup> | 1.52±0.91 <sup>ab</sup> | 1.34±1.08 <sup>b</sup> | 0.18±0.16 <sup>b</sup> | 2.81±0.69 <sup>a</sup> | 1.23±0.89 <sup>ab</sup> | 1.74±1.81 <sup>ab</sup> | 0.16±0.14 <sup>b</sup>  | 2109 | 2109 |                 |
| 49 | Indole             | 0.34±0.08 <sup>b</sup> | 0.38±0.03 <sup>ab</sup> | 0.37±0.03 <sup>b</sup> | 1.08±0.74 <sup>a</sup> | 2.40±0.44 <sup>a</sup> | 2.13±0.44 <sup>a</sup>  | 2.17±0.34 <sup>a</sup>  | 4.11±2.09 <sup>a</sup>  | 2436 | 2436 | mothball, burnt |
|    | Others             | 3.36±0.63              | 1.90±0.88               | 1.71±1.09              | 1.90±0.92              | 5.65±0.97              | 3.94±0.29               | 4.52±1.03               | 5.87±2.53               | 1287 | 1287 |                 |

ND: not detected.

Means with the same superscript letter were not significantly different ( $p < 0.05$ ).

a: calculated retention index were determined using n-alkanes C6 to C24 as external standards on a DB-Wax column.

b: RI<sub>ref</sub> were obtained from <https://webbook.nist.gov/>.

c: odor description were obtained from <https://www.flavornet.org/> and <http://www.thegoodscentscompany.com/>.

RR: raw rice; WR: washed rice; PR: presoaked rice; CR: cooked rice; ND: not detected.
